# Supplementary material
Source: publisher figshare collection journal article supplement (https://sage.figshare.com/ndownloader/files/14413136)

**Supplemental Figure 1A. Survival by histology**

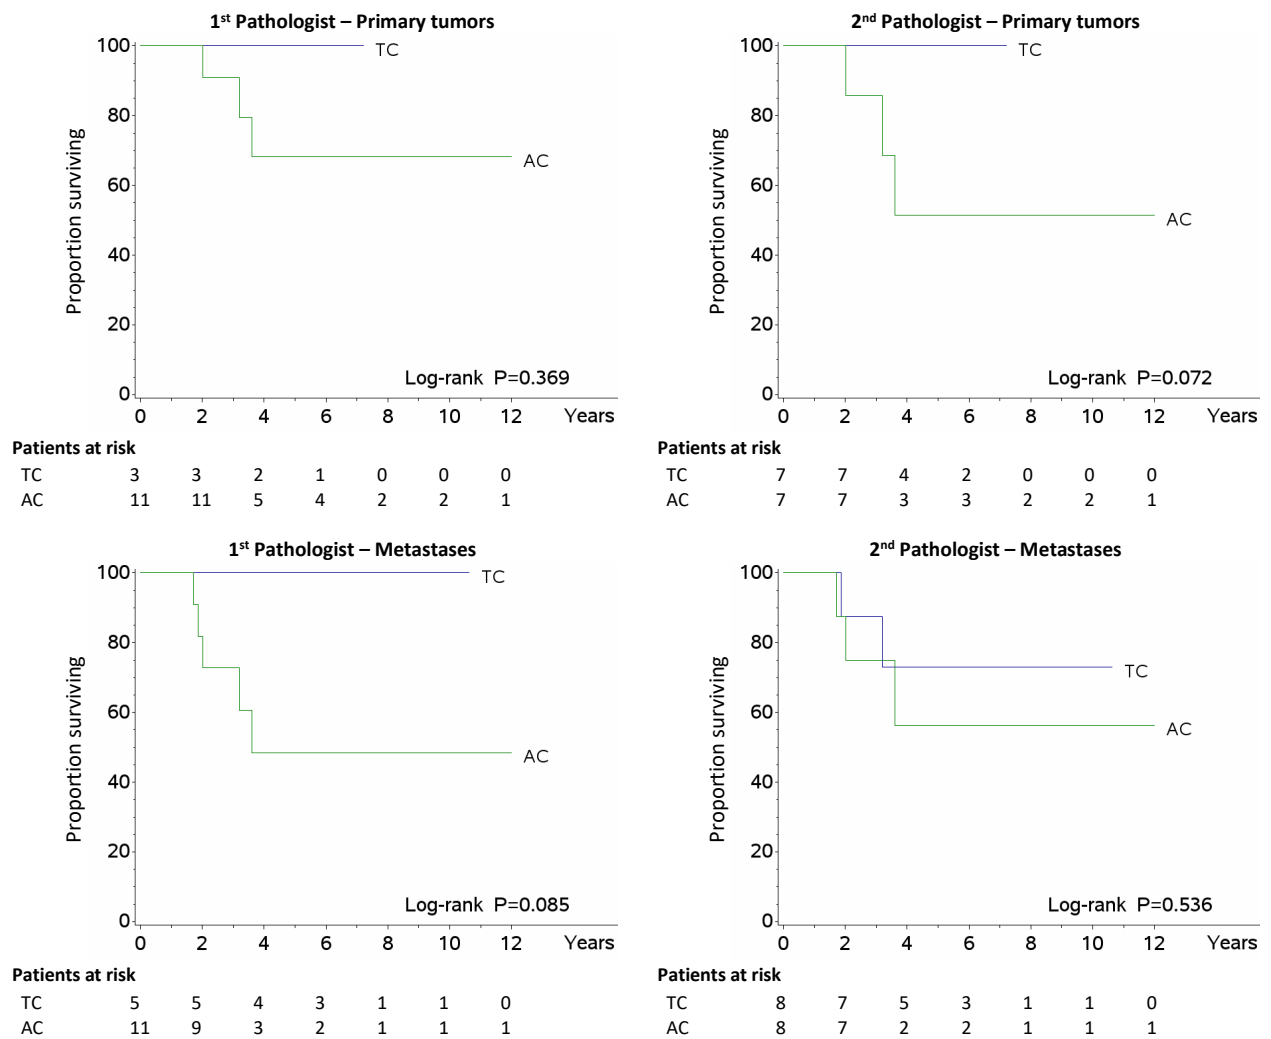

**Supplemental Figure 1B.** Survival by Ki-67

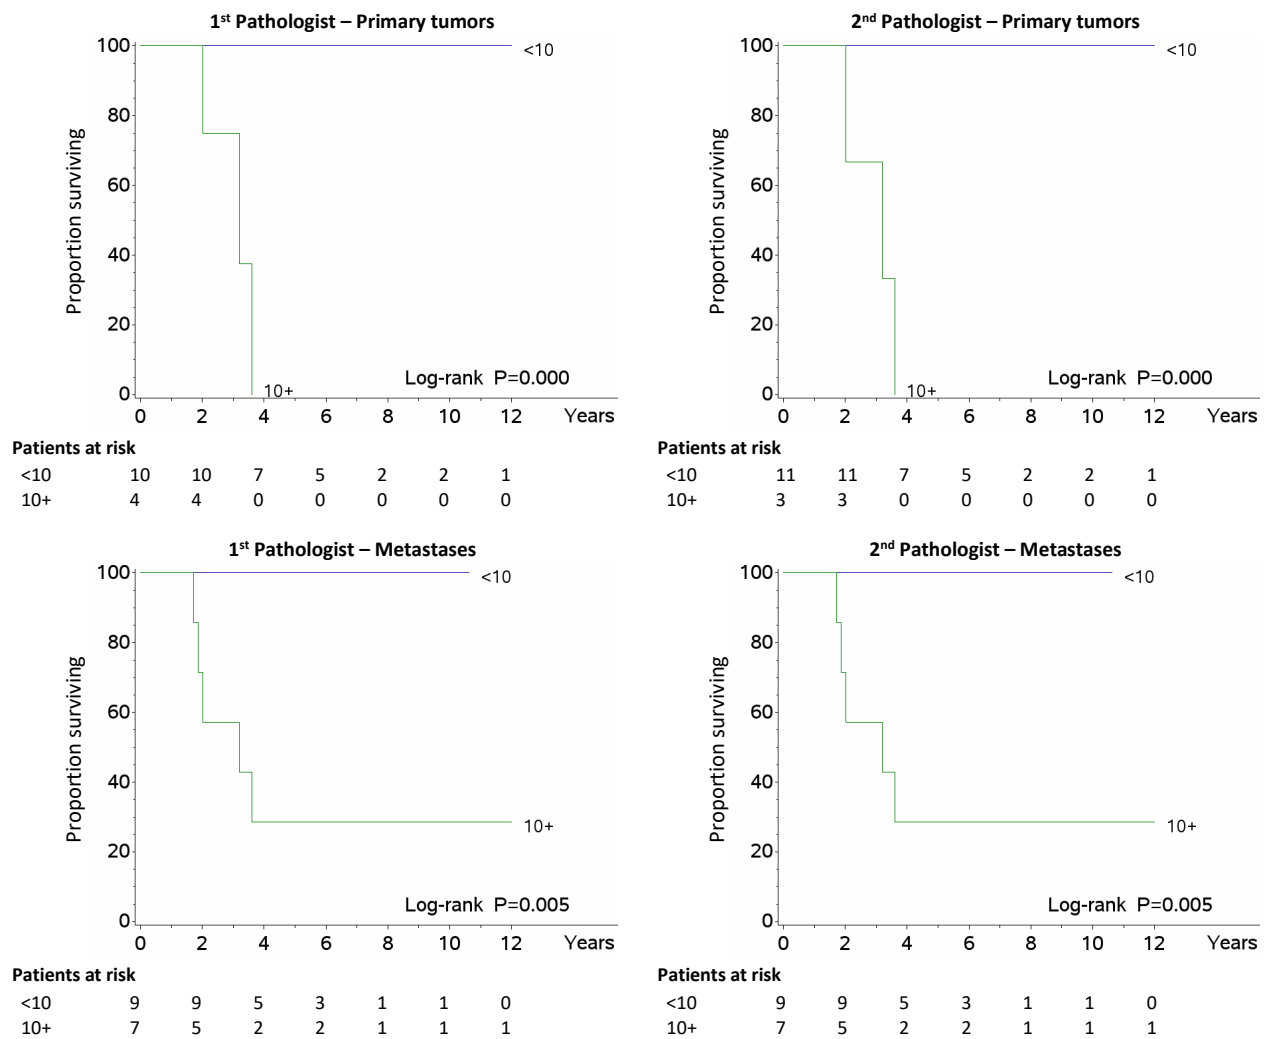

Supplement: Supplementary file 1 [file 14413136]
